# Supplementary material for: Comb-like poly(β-amino ester)-integrated PEO-based self-healing solid electrolytes for fast ion conduction in lithium–sulfur batteries
Source: Royal Society of Chemistry journal article supplement (doi:10.1039/d4mh01181c), 2024-10-15
Supplement: d4mh01181c1.pdf [file d4mh01181c1.pdf]

## Supporting Information

### **Comb-like poly( $\beta$ -amino ester)-integrated PEO-based self-healing solid electrolyte with fast ion conduction for lithium–sulfur batteries**

Hui-Min Wang<sup>a,b</sup>, Mengdi Geng<sup>a</sup>, Jing Bai<sup>a</sup>, Dezhong Zhou<sup>\*c</sup>, Weibo Hua<sup>c</sup>, Sheng Liu<sup>\*a</sup> and Xueping Gao<sup>\*a</sup>

a. Institute of New Energy Material Chemistry, School of Materials Science and Engineering, Nankai University, Tianjin 300350, China. \*Email: shengliu@nankai.edu.cn, xpgao@nankai.edu.cn

b. School of Materials Science and Engineering, Sichuan University of Science & Engineering, Sichuan, Zigong 643000, China.

c. School of Chemical Engineering and Technology, Xi'an Jiaotong University, Xi'an 710049, China. \*Email: dezhong.zhou@xjtu.edu.cn

## Experimental Section

### *Preparation of PAE and PPAEs*

Firstly, PEGDA, [4-(aminomethyl)phenyl] boronic acid and triethylamine were dissolved in anhydrous dimethyl sulfoxide (DMSO) with a molar ratio of 1:1:1.3, and the monomer concentration was 500 mg mL<sup>-1</sup>. The reaction proceeds at 120 °C under magnetic stirring. After 3 hours, the reaction was stopped by cooling down to room temperature (RT) as the M<sub>w</sub> was approached 40 kDa. Subsequently, PEGDA was further added and diluted with DMSO to a final concentration of 100 mg mL<sup>-1</sup> to end-cap the polymer at 25 °C for 48 hours. After purifying the resulting polymers with three diethyl ether washes and drying in a vacuum chamber at RT, PAE was obtained.

PEO (M<sub>w</sub> = 600,000), lithium bis(trifluoromethanesulphony)imide (LiTFSI) (EO:Li = 18:1, molar ratio) and different contents of PAE (2%, 6%, 10% relative to PEO) were mixed in 1-Methyl-2-pyrrolidinone (NMP) and stirred for 12 hours. Then, 1 wt% 2-hydroxy-2-methyl-1-phenyl-1-propanone (HMPP) as a light initiator was added to the mixture. After stirring uniformly, the solution was poured onto a Teflon membrane and irradiated under UV light ( $\lambda$  = 365 nm) for 20 minutes, then dried at 80 °C for 48 hours and punched into 16 mm disks. For comparison, the PEO-SPE was prepared similarly by casting the PEO/LiTFSI solution onto a Teflon membrane and drying it in vacuum oven at 80 °C for 48 hours.

### *Material characterization*

The M<sub>w</sub> of polymers were determined using GPC (Agilent 1260 infinity II). The chemical compositions and structures of polymers were confirmed by <sup>1</sup>H nuclear magnetic resonance (NMR, JNM-ECZ400S/L1) and Fourier transform infrared (FTIR, Bruker-TENSOR 37). The morphologies and elemental distribution spectroscopy (EDS) mappings of SPE were analysed using field emission scanning electron microscopy (SEM, JSM-7800F). The crystallographic structure of SPEs was studied by X-ray diffraction spectrum (XRD, Rigaku mini Flex II). The

differential scanning calorimetry (DSC) analysis was measured with METTLER TOLEDO, TGA/DSC1, and the stress-strain test was performed on a universal tensile testing machine (SHIMADZU TRAPEZIUMX, Japan). The composition of the SEI was analyzed by the X-ray photoelectron spectra (XPS, PHI5000 Versa Probe-ESCALAB 250xi). Raman spectra were recorded by the Raman spectrometer (TEO SR-500I-A). Solid-state  $^1\text{H}$  and  $^7\text{Li}$  NMR measurements were performed on Bruker Avance III WB 400 spectrometer.

### *Preparation of the cathode electrode*

Firstly, sulfur and carbon nanotubes were blended at a weight ratio of 7:3 and then heated to 155 °C for 12 hours to obtain the S/C composite. Next, the S/C composite, super P, binder of PEO and LiTFSI (EO:Li = 18:1, molar ratio) with a mass ratio of 6:1:3 were dispersed in NMP. The obtained slurry was then coated on the current collector of Al foil and dried at 60 °C. Then it was cut into 10 mm disks. The active material loading of sulfur was 0.6–0.8 mg cm<sup>-2</sup>. Composite cathode electrodes with higher S-content (49%) and S-loading (1.0 and 4.3 mg cm<sup>-2</sup>) were prepared with the S/C composite, super P, binder of PEO and LiTFSI (EO:Li = 18:1, molar ratio) with a mass ratio of 7:1:2.

### *Electrochemical measurement*

Electrochemical impedance spectroscopy (EIS) tests were conducted using SS | SPE | SS symmetric cells on an electrochemical workstation (Zahner IM6ex) from 20 to 60 °C, with the frequency range from 100 mHz to 1 MHz, and the amplitude voltage was 10 mV. The ionic conductivity of SPE was calculated as the equation of  $\sigma = L/(SR)$ , where  $L$ ,  $S$ , and  $R$  were the SPE thickness (cm), SPE area (cm<sup>2</sup>), and SPE resistance ( $\Omega$ ), respectively. The  $t_{\text{Li}^+}$  was measured in Li | SPE | Li symmetric cell with DC polarization at 60°C, which was calculated as:  $t_{\text{Li}^+} = I_S(\Delta V - I_0 R_0) / I_0(\Delta V - I_S R_S)$ .  $I_S$ ,  $I_0$  stand for the steady-state and initial currents,  $R_S$ ,  $R_0$  present the steady-state and initial resistances,  $\Delta V$  was 10 mV. The linear sweep voltammetry (LSV) and cyclic voltammetry (CV) curves were tested by the CHI 600A electrochemical workstation with a scan rate of 0.5 mV s<sup>-1</sup> and 0.1 mV s<sup>-1</sup>, respectively. The discharge/charge

tests were performed in Li | SPE | S/C CR2032 coin cells at a voltage range of 1.6–2.8 V using the LAND test system (LAND CT2001A). All the electrochemical measurements were conducted at 60 °C.

## Supplementary Figures

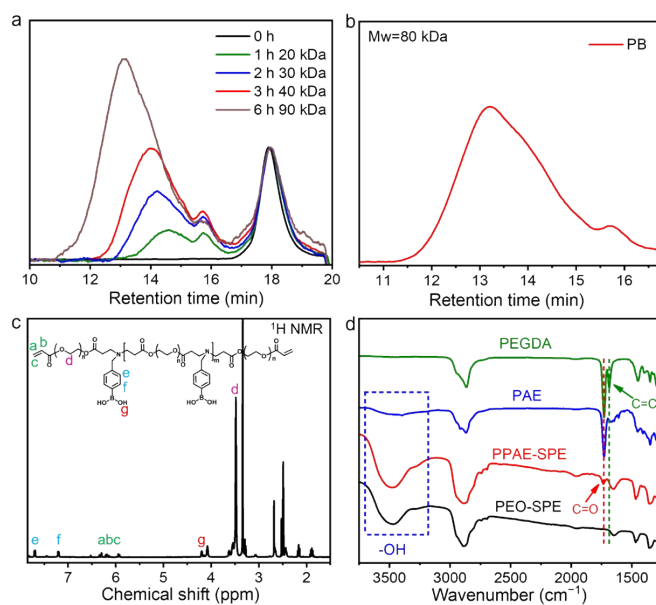

**Figure S1.** (a) The molecular weight evolution of PAE monitored by GPC. (b) GPC spectrum of purified PAE. (c) <sup>1</sup>H NMR spectrum of PAE. (d) FTIR spectra of PEGDA, PAE, PPAE-SPE, and PEO-SPE.

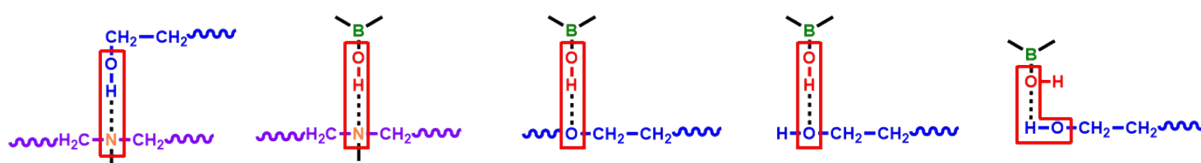

**Figure S2.** The quintuple hydrogen bonds in PPAE-SPE.

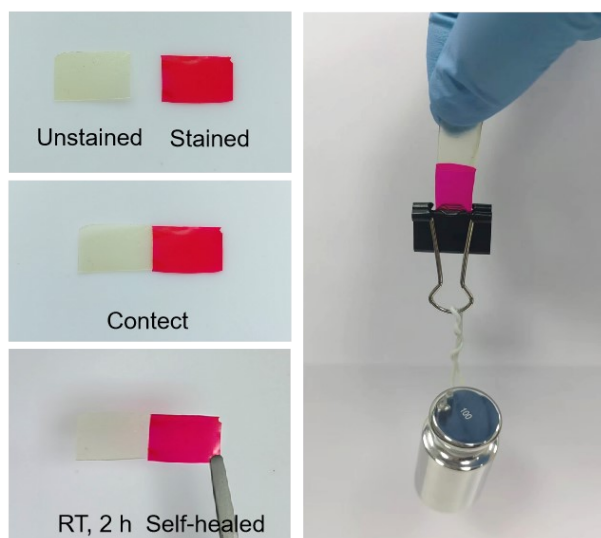

**Figure S3.** Self-healing tests of PPAE-SPE.

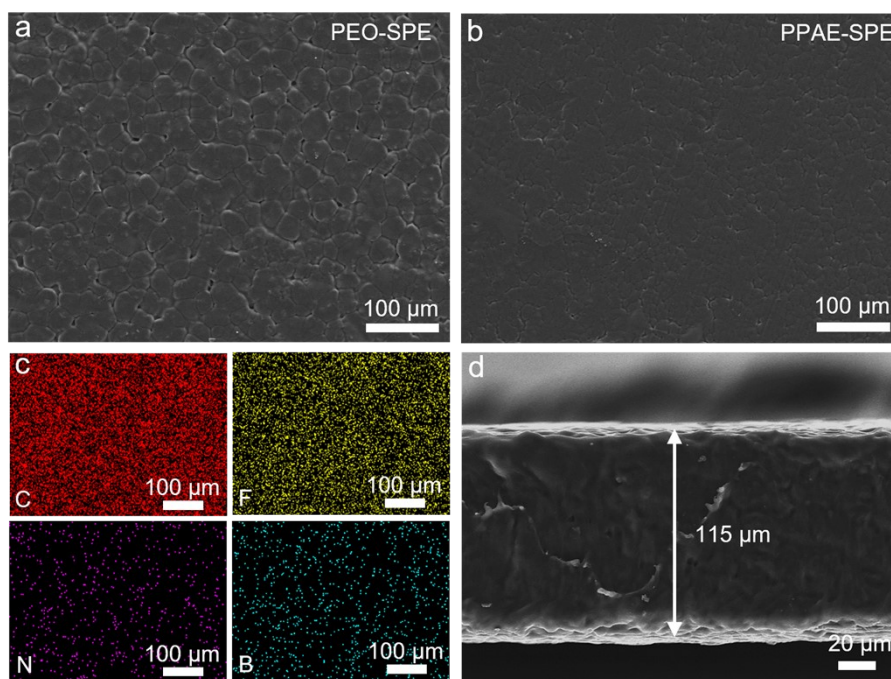

**Figure S4.** SEM images of (a) PEO-SPE and (b) PPAE-SPE. (c) EDS mappings and (d) cross-sectional SEM images of PPAE-SPE.

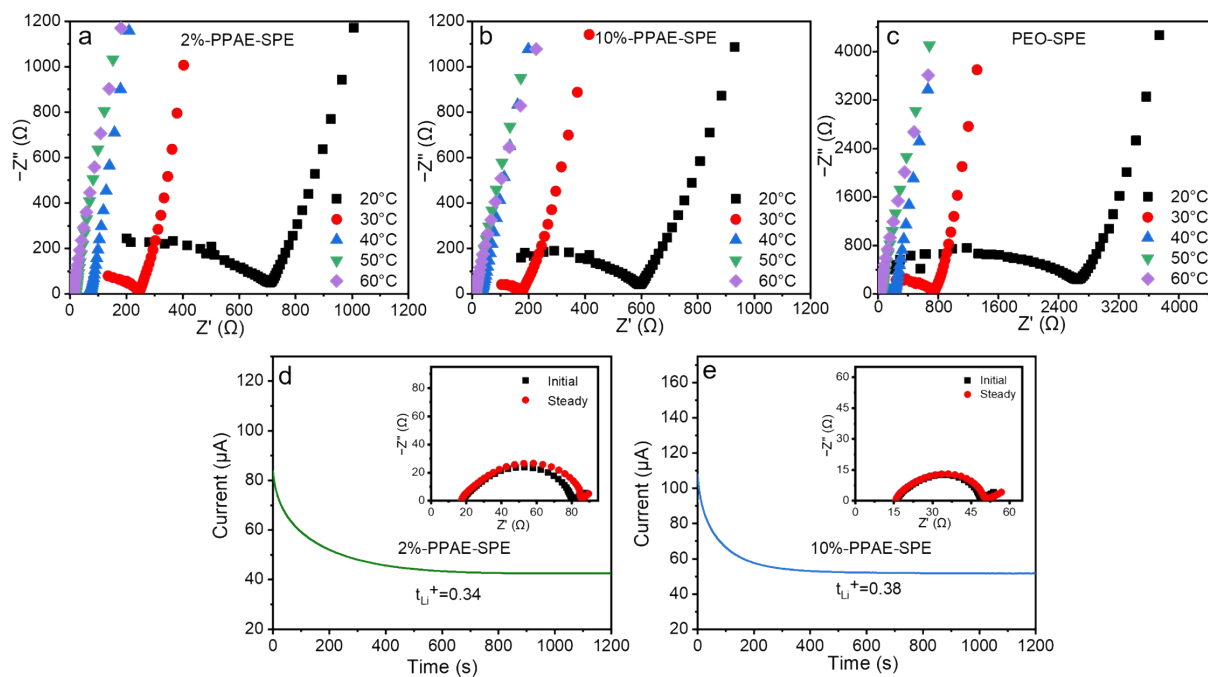

**Figure S5.** (a-c) EIS plots of PPAE-SPEs from 20 to 60 °C. (d, e) Lithium-ion transference numbers 2%-PPAE-SPE and 10%-PPAE-SPE.

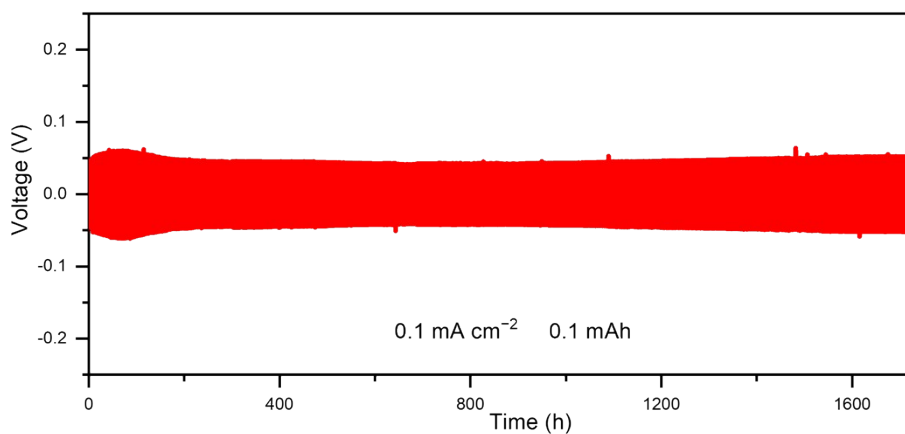

**Figure S6.** The voltage profile of lithium symmetrical cell with PPAE-SPE at  $0.1 \text{ mA cm}^{-2}$ .

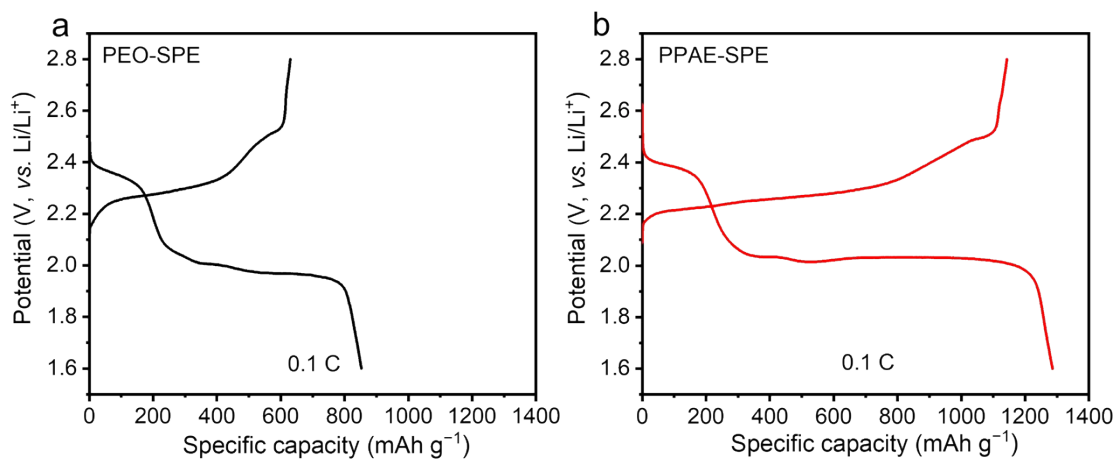

**Figure S7.** The initial discharge/charge curves of the cells with (a) PEO-SPE and (b) PPAE-SPE at 0.1 C.

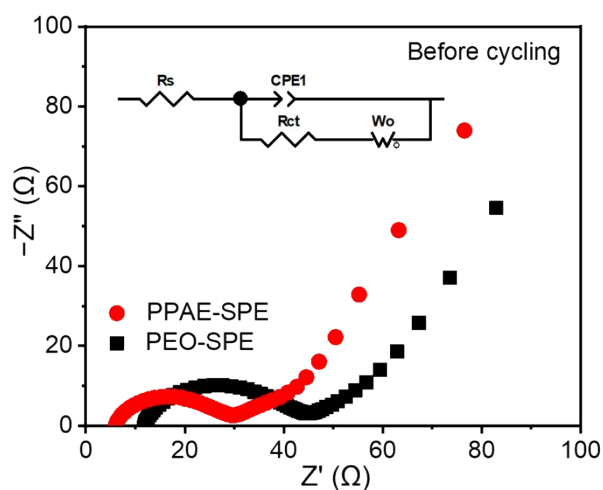

**Figure S8.** EIS plots of the cells with PEO-SPE and PPAE-SPE before cycling.

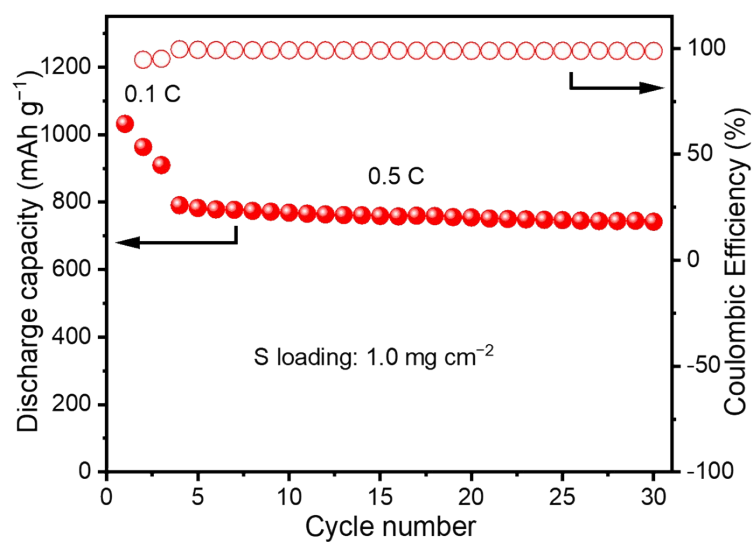

**Figure S9.** Cycling performance of the cells with PPAE-SPE at 0.5 C.

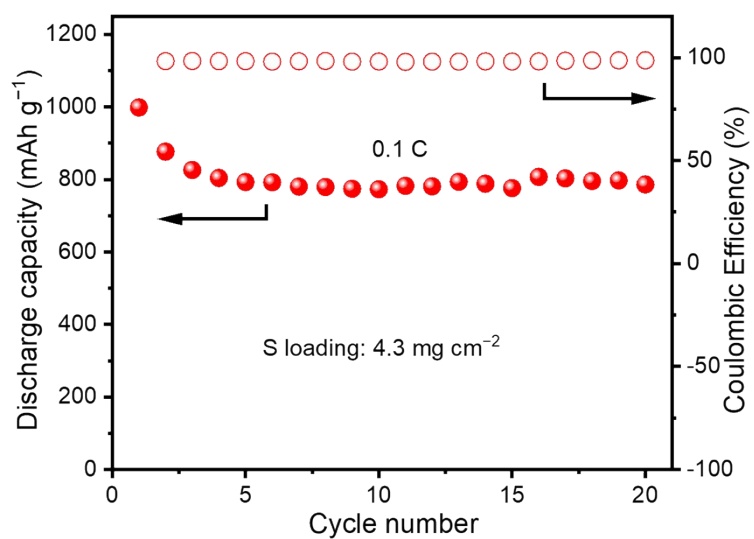

**Figure S10.** Cycling performance of the cells using PPAE-SPE with heavy S-loading.

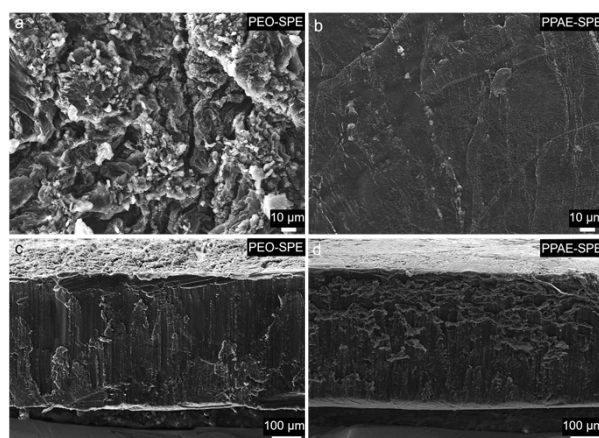



**Figure S11.** SEM images of the Li anodes retrieved from the Li-S cells with PEO-SPE and PPAE-SPE after 80 cycles. (a, b) Surface morphology and (c, d) cross-sectional morphology.

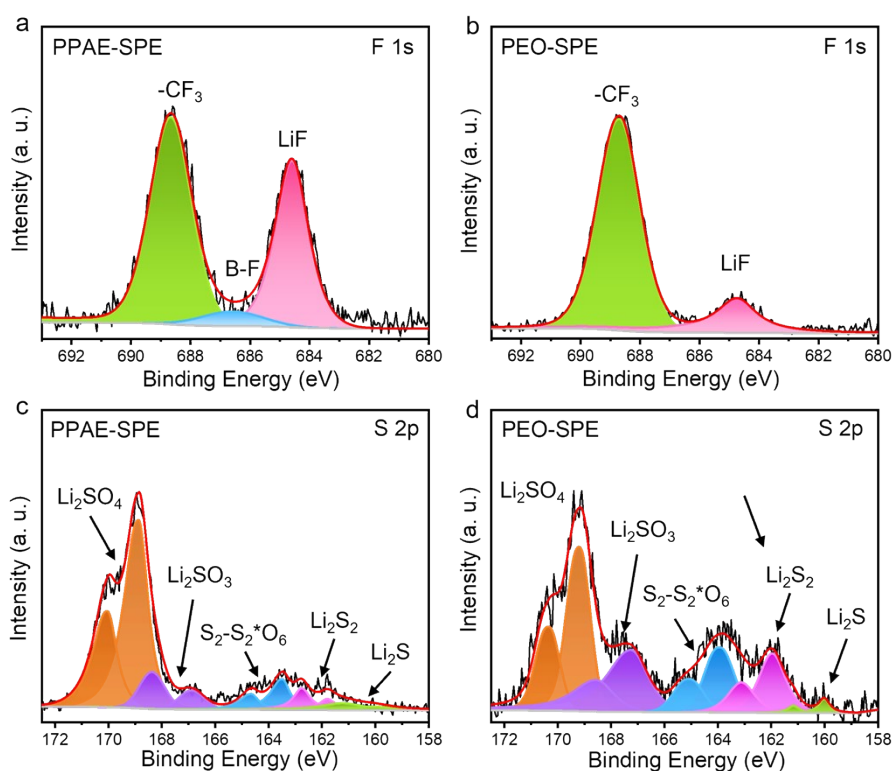

**Figure S12.** XPS analysis for F 1s and S 2p of the Li anodes retrieved from the Li-S cells with (a, c) PPAE-SPE and (b, d) PEO-SPE.

## Supplementary Tables

Table S1. Ionic conductivity of PEO-SPE and PPAE-SPE at different temperatures.

| Electrolytes | $\sigma$ (S cm <sup>-1</sup> ) |                       |                       |                       |                       |
|--------------|--------------------------------|-----------------------|-----------------------|-----------------------|-----------------------|
|              | 20 °C                          | 30 °C                 | 40 °C                 | 50 °C                 | 60 °C                 |
| PEO-SPE      | $1.88 \times 10^{-6}$          | $7.66 \times 10^{-6}$ | $2.37 \times 10^{-5}$ | $9.90 \times 10^{-5}$ | $3.14 \times 10^{-4}$ |
| PPAE-SPE     | $1.25 \times 10^{-5}$          | $4.20 \times 10^{-5}$ | $2.21 \times 10^{-4}$ | $4.63 \times 10^{-4}$ | $6.48 \times 10^{-4}$ |

Table S2. Summary of ionic conductivity of different SPEs.

| Electrolyte composition                                   | $\sigma$ (S cm <sup>-1</sup> ) |                       |                       |                       | Ref.             |
|-----------------------------------------------------------|--------------------------------|-----------------------|-----------------------|-----------------------|------------------|
|                                                           | 30 °C                          | 40 °C                 | 50 °C                 | 60 °C                 |                  |
| PI/PEO/LiTFSI                                             | $3.68 \times 10^{-5}$          | —                     | —                     | $1.54 \times 10^{-4}$ | S1               |
| PEO/LLZTO/LiTFSI/aceta<br>mide/LiDFOB                     |                                |                       |                       | $5.10 \times 10^{-5}$ | S2               |
| PEO/LiTFSI/In <sub>2</sub> O <sub>3</sub>                 | —                              | —                     | —                     | $5.27 \times 10^{-4}$ | S3               |
| PEO/LiTFSI/6% h-BN                                        | $7.70 \times 10^{-6}$          | $1.91 \times 10^{-5}$ | $4.70 \times 10^{-5}$ | $8.90 \times 10^{-5}$ | S4               |
| PEO/PI/LiPFSI                                             |                                |                       |                       | $2.70 \times 10^{-4}$ | S5               |
| PEO/LiTFSI/Al <sub>2</sub> O <sub>3</sub> - $\delta$ -600 | —                              | —                     | —                     | $3.81 \times 10^{-4}$ | S6               |
| 21- $\beta$ -CD-g-PTFEMA<br>/PEO/ LiTFSI                  | $6.57 \times 10^{-6}$          | $2.45 \times 10^{-5}$ | $1.43 \times 10^{-4}$ | $3.20 \times 10^{-4}$ | S7               |
| <b>PPAE-SPE</b>                                           | $4.20 \times 10^{-5}$          | $2.21 \times 10^{-4}$ | $4.63 \times 10^{-4}$ | $6.48 \times 10^{-4}$ | <b>This work</b> |

Table S3. Summary of electrochemical properties of different SPEs

| Electrolyte composition           | Li symmetrical cells                            | Li-S cells                       |                                                |                  | Ref.             |
|-----------------------------------|-------------------------------------------------|----------------------------------|------------------------------------------------|------------------|------------------|
|                                   | Current density (mA cm <sup>-2</sup> )/Life (h) | S loading (mg cm <sup>-2</sup> ) | Initial capacity (mAh g <sup>-1</sup> )/C rate | Temperature (°C) |                  |
| PEO/LiTFSI/TMPE TA/PEGDMA         | 0.1/1600                                        | 0.8                              | 1133/0.1 C                                     | 60               | 42               |
| PEO/LLZTO/LiTFSI/acetamide/LiDFOB | 0.1/1000                                        | 0.7-0.9                          | 1012/0.05 C                                    | 60               | S2               |
| AQT@PEO/LiTFSI                    | —                                               | 0.2-0.7                          | 1133/0.1 C                                     | 60               | S8               |
| PEO/LiTFSI//LiBAMB/PETMA/DMPA     | 0.25/350                                        | 0.8                              | 1040/0.1 C                                     | 80               | S9               |
| PEO/LiTFSI/PFA                    | 0.1/500                                         | 0.5                              | 1170/0.05 mA cm <sup>-2</sup>                  | 60               | S10              |
| PEO-LLZTO-MgF <sub>2</sub>        | 0.2/500                                         | 0.5                              | 812/0.2 C                                      | 60               | S11              |
| <b>PPAE-SPE</b>                   | 0.2/800                                         | 0.6-0.8                          | 826.1/0.2 C                                    | 60               | <b>This work</b> |
|                                   |                                                 |                                  | 1285.8/0.1 C                                   |                  |                  |

**Reference:**

[S1] J. Wu, Z. Rao, Z. Cheng, L. Yuan, Z. Li and Y. Huang, *Advanced Energy Materials*, 2019, **9**, 1902767.

[S2] M. Li, Z. Huang, Y. Liang, Z. Wu, H. Zhang, H. Chen and S. Zhang, *Advanced Functional Materials*, 2024, 2413580.

[S3] X. Zhang, H. Zhang, Y. Geng, Z. Shi, S. Zhu, Q. Xu, Y. Min, *Chemical Engineering Journal*, 2022, **444**, 136328.

[S4] Y. Li, L. Zhang, Z. Sun, G. Gao, S. Lu, M. Zhu, Y. Zhang, Z. Jia, C. Xiao, H. Bu, K. Xi and S. Ding, *Journal of Materials Chemistry A*, 2020, **8**, 9579–9589.

[S5] J. Li, H. Hu, W. Fang, J. Ding, D. Yuan, S. Luo, H. Zhang and X. Ji, *Advanced Functional Materials*, 2023, **33**, 2303718.

[S6] Y. Song, L. Yang, J. Li, M. Zhang, Y. Wang, S. Li, S. Chen, K. Yang, K. Xu and F. Pan, *Small*, 2021, **17**, 2102039.

- [S7] Y. Su, X. Rong, A. Gao, Y. Liu, J. Li, M. Mao, X. Qi, G. Chai, Q. Zhang, L. Suo, L. Gu, H. Li, X. Huang, L. Chen, B. Liu, Y.-S. Hu, *Nature Communications*, 2022, **13**, 4181.
- [S8] X. Gao, X. Zheng, Y. Tsao, P. Zhang, X. Xiao, Y. Ye, J. Li, Y. Yang, R. Xu, Z. Bao and Y. Cui, *Journal of the American Chemical Society*, 2021, **143**, 43, 18188–18195.
- [S9] L. Zhong, S. Wang, M. Xiao, W. Liu, D. Han, Z. Li, J. Qin, Y. Li, S. Zhang, S. Huang, Y. Meng, *Energy Storage Materials*, 2021, **41**, 563–570.
- [S10] Y. An, Y. Cheng, S. Wang and J. Yu, *ACS Applied Energy Materials*, 2022, **5**, 2786–2794.
- [S11] H. Duan, L. Liao, R. Bi, Y. Deng and G. Chen, *Journal of Materials Chemistry A*, 2023, **11**, 19046–19055.
